# Supplementary material
Source: publisher figshare collection journal article supplement (https://acs.figshare.com/ndownloader/files/24166026)
Supplement: Supplementary file 1 [file 24166026]

## ***Supporting Information***

# **Stabilizing Liquid Electrolytes in Porous PVDF Matrix Incorporated with Star Polymers with Linear PEG Arms and CycloPEG Cores**

Shaoqiao Li,<sup>†</sup> Zhuliu Xiao,<sup>†</sup> Kairui Guo,<sup>†</sup> Huihui Gan,<sup>†</sup> Jirong Wang,<sup>†</sup> Yong Zhang,<sup>†</sup>

Liping Yu,<sup>†</sup> and Zhigang Xue<sup>\*,†,‡</sup>

<sup>†</sup> *Key Laboratory for Material Chemistry of Energy Conversion and Storage, Ministry of Education, School of Chemistry and Chemical Engineering, Huazhong University of Science and Technology, Wuhan 430074, P. R. China.* <sup>‡</sup> *State Key Laboratory of Materials Processing and Die & Mold Technology, Huazhong University of Science and Technology, Wuhan 430074, China.*

E-mail address: zgxue@mail.hust.edu.cn (Z. Xue)

Number of pages: 3

Number of figures: 4

## **Table of Contents**

|                                                                         |    |
|-------------------------------------------------------------------------|----|
| Figure S1. Electrolyte leakage behavior.....                            | S2 |
| Figure S2. Electrolyte uptake and porosity.....                         | S2 |
| Figure S3. Activation energy.....                                       | S3 |
| Figure S4. Current-time curve for the calculation of $t_{Li}^{+}$ ..... | S3 |

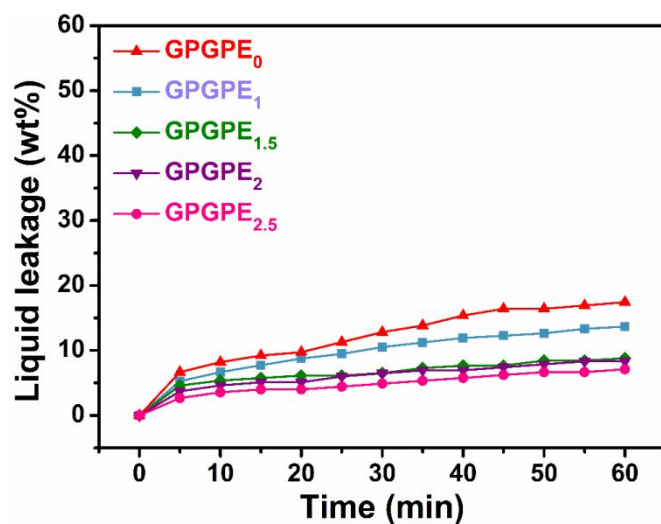

**Figure S1.** Electrolyte leakage curves of GPGPEs

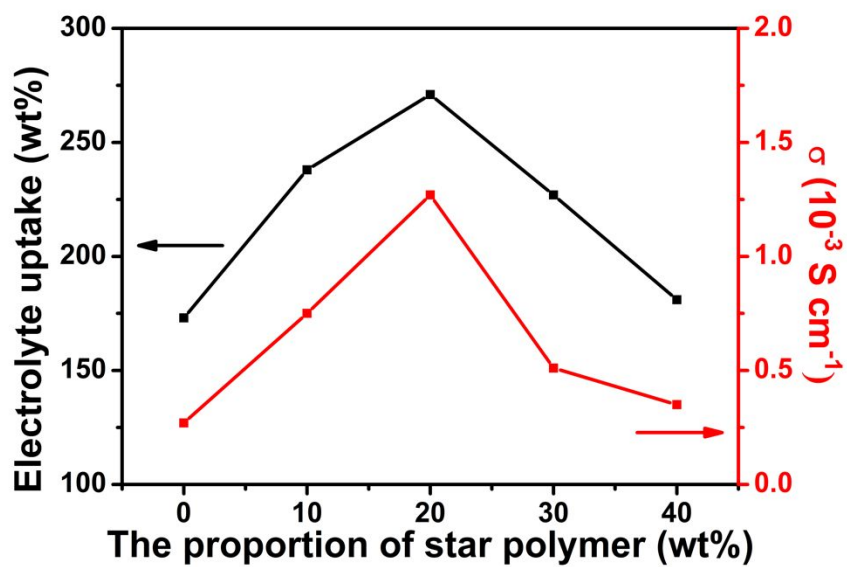

**Figure S2.** Electrolyte uptake and porosity of PGPEs membranes with different mass ratios of star polymer.

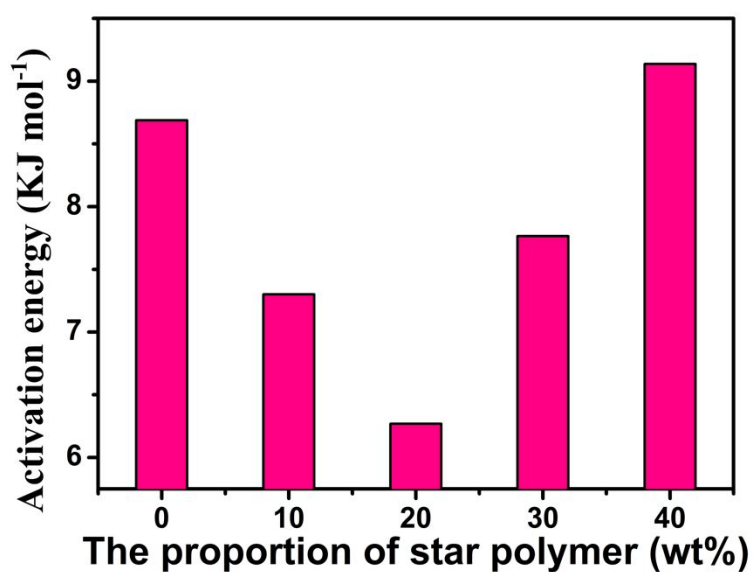

**Figure S3.** Activation energy of PGPEs with different mass fractions of star polymer.

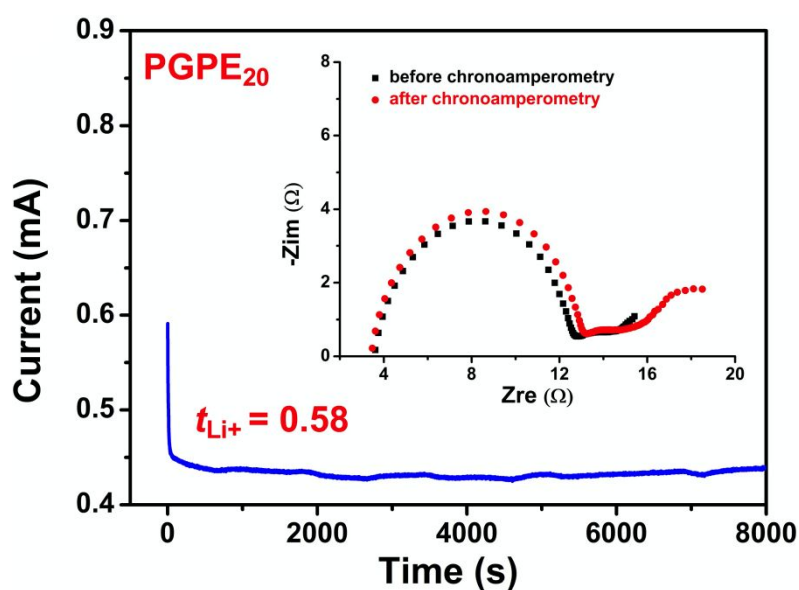

**Figure S4.** Current-time curve obtained for PGPE<sub>20</sub> from chronoamperometry at a DC polarization of 10 mV, inset: Nyquist profiles of the cells before and after polarization. The test was run at 60 °C.
